# Supplementary material
Source: publisher figshare collection journal article supplement (https://rs.figshare.com/ndownloader/files/14126378)

**Figure S1.** Measured predation rate of copepod nauplii by incubation experiments as function of the predicted predation risk from behavioural observations ( $\beta \pm \text{SD}$ ,  $\text{mL pred}^{-1} \text{d}^{-1}$ ). The reference line indicates where  $\beta_{\text{measured}} = \beta_{\text{predicted}}$ .

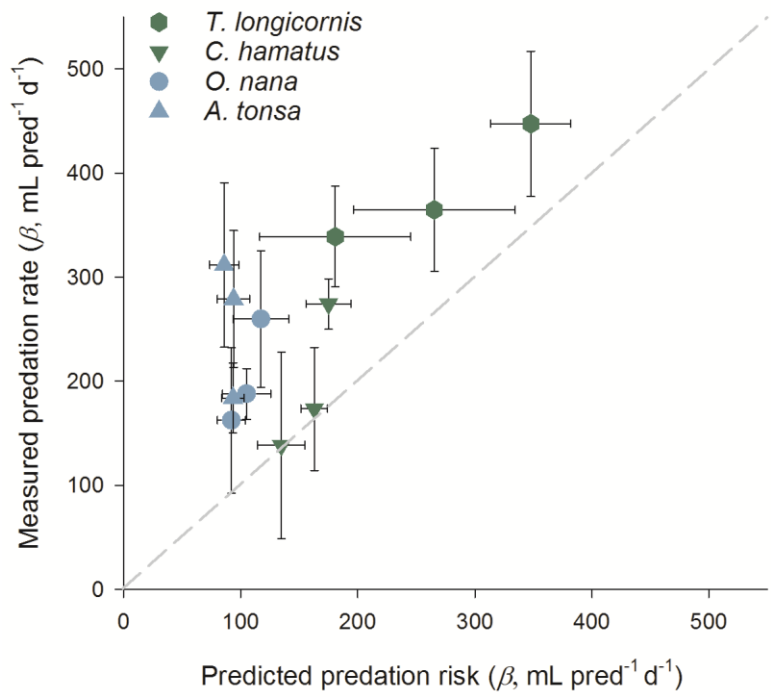

Supplement: Supplementary file 1 [file 14126378]
